# Supplementary material
Source: Elsevier journal article supplement (https://authors.library.caltech.edu/36785/8/mmc5.xlsx)
Supplement: mmc5 [file mmc5.xlsx]

## Sheet: Sheet1
Supplementary Table A2 - He Diffusion and 4He/3He Data on Hematite subsample S1
Sample A
Step	T(oC)	time (hrs)	F3He	4He3HeN	ln(D/a2)	Step Age (Ma)
1	50	1	6.89038e-05	0.0192487	-29.7931	2.52159
2	250	0.1	0.0397567	0.023613	-14.7748	3.09331
3	250	0.2	0.0507646	0.10144	-15.8928	13.2886
4	250	0.4	0.0620209	0.119866	-16.3346	15.7024
5	250	0.8	0.0763103	0.13456	-16.5742	17.6273
6	250	1	0.0881411	0.150327	-16.8023	19.6928
7	250	1	0.0969524	0.155615	-16.9699	20.3855
8	250	1	0.104157	0.158125	-17.0814	20.7144
9	250	1	0.11007	0.161769	-17.21	21.1917
10	250	1	0.115384	0.165212	-17.2607	21.6428
11	250	1	0.119509	0.165464	-17.4689	21.6757
12	250	1	0.123852	0.168501	-17.3781	22.0737
13	250	2	0.131703	0.174422	-17.425	22.8493
14	250	2	0.138215	0.180548	-17.5508	23.6517
15	260	1.5	0.146419	0.180706	-16.9723	23.6725
16	260	1	0.151103	0.189792	-17.0773	24.8627
17	325	0.25	0.194846	0.205474	-13.2824	26.9171
18	325	0.5	0.224913	0.253302	-14.1221	33.1825
19	325	1	0.247749	0.331598	-14.9453	43.4394
20	350	0.25	0.259069	0.399651	-14.1736	52.3543
21	350	1	0.28098	0.509063	-14.8183	66.6872
22	350	1	0.290608	0.611759	-15.5671	80.1404
23	400	0.25	0.307722	0.724855	-13.545	94.956
24	400	1	0.326569	0.908164	-14.7563	118.97
25	400	1	0.333101	0.995713	-15.7623	130.438
26	425	3	0.354488	1.10344	-15.6169	144.551
27	425	3	0.362946	1.08054	-16.4844	141.551
28	425	3	0.36889	1.11632	-16.8085	146.238
29	425	3	0.373631	1.06393	-17.0136	139.375
30	450	2	0.382602	1.07543	-15.9436	140.881
31	475	0.25	0.385172	1.11475	-15.0918	146.032
32	475	0.25	0.387733	1.0559	-15.0854	138.323
33	550	0.5	0.436858	1.13066	-12.7256	148.116
34	600	0.5	0.52501	1.13594	-11.8882	148.808
35	625	1	0.627492	1.28255	-12.0902	168.015
36	650	1	0.69587	1.48439	-12.1837	194.456
37	700	1	0.801292	1.4242	-11.3807	186.57
38	700	2	0.86693	1.47618	-12.0953	193.38
39	700	3	0.906928	1.51715	-12.6052	198.747
40	700	4	0.930886	1.57973	-13.0762	206.945
41	800	1	0.975036	1.55499	-10.4598	203.704
42	820	1	0.987405	1.51985	-10.8576	199.1
43	840	1	0.993393	1.52258	-10.9162	199.458
	fusion		1	1.52391
Sample B
Step	T(oC)	time (hrs)	F3He	4He3HeN	ln(D/a2)	Step Age (Ma)
1	50	1	0.000111141	-0.00229056	-28.8369	-0.300063
2	100	1	0.004811	0.00177576	-21.3017	0.232625
3	150	1	0.0205665	0.00274745	-18.4519	0.359916
4	199	1	0.0374371	0.01953	-17.5569	2.55842
5	239	0.1	0.0458382	0.0636223	-15.5899	8.33452
6	249	1	0.0793701	0.119207	-16.0485	15.6161
7	289	0.1	0.106503	0.158885	-13.5375	20.8139
8	299	1	0.190952	0.191623	-14.1813	25.1026
9	338	0.1	0.217816	0.236894	-12.6573	31.0331
10	348	1	0.283088	0.365548	-13.8209	47.8868
11	385	0.1	0.298279	0.574698	-12.7861	75.2854
12	398	1	0.335771	0.780869	-14.0687	102.294
13	410	0.1	0.338339	0.949772	-14.363	124.42
14	422	1	0.356527	1.10734	-14.6656	145.061
15	500	1	0.471461	1.06046	-12.5577	138.92
16	500	1	0.498843	1.13195	-13.7387	148.285
17	550	1	0.569865	1.21918	-12.609	159.712
18	550	1	0.594643	1.28009	-13.4943	167.692
19	600	1	0.669273	1.37038	-12.2077	179.519
20	600	11	0.70003	1.43257	-12.8963	187.667
21	650	1	0.785	1.50502	-11.6296	197.158
22	650	1	0.818754	1.53512	-12.2694	201.101
23	700	1	0.891329	1.58371	-11.1468	207.466
24	700	1	0.91579	1.56431	-11.8444	204.924
25	750	1	0.958509	1.59606	-10.8235	209.084
26	750	1	0.970217	1.57081	-11.582	205.777
27	800	1	0.987995	1.57147	-10.5738	205.862
28	800	1	0.992468	1.54559	-11.2411	202.472
29	850	1	0.997886	1.58008	-10.2384	206.99
30	850	1	0.998937	1.50166	-10.8534	196.717
31	900	1	0.99977	1.59058	-10.0514	208.365
32	900	1	0.999895	1.40421	-10.7164	183.952
33	Fusion		1	2.88982
Sample C
Step	T(oC)	time (hrs)	F3He	4He3HeN	ln(D/a2)	Step Age (Ma)
1	50	1	9.39905e-05	-0.0351595	-29.1721	-4.60589
2	100	1	0.00498622	0.000575707	-21.23	0.0754177
3	150	1	0.0210383	0.00162436	-18.4081	0.212791
4	200	1	0.0373909	0.0174838	-17.5808	2.29038
5	249	0.1	0.0485132	0.0721075	-15.2782	9.44608
6	250	1	0.0735914	0.119152	-16.3659	15.6089
7	298.6	0.1	0.107122	0.152788	-13.3558	20.0152
8	300	1	0.176494	0.188013	-14.4332	24.6296
9	347	0.1	0.21132	0.241047	-12.4603	31.5771
10	350	1	0.267049	0.378563	-14.0371	49.5917
11	397	0.1	0.287381	0.602131	-12.5566	78.8791
12	400	1	0.316505	0.827432	-14.3871	108.394
13	422	0.1	0.320328	0.972374	-14.0437	127.381
14	425	1	0.336054	1.01017	-14.8906	132.332
15	450	1	0.379163	1.01412	-13.7609	132.85
16	500	1	0.44379	1.06371	-13.1468	139.346
17	550	1	0.52316	1.1655	-12.6779	152.681
18	600	1	0.629112	1.27231	-12.0569	166.673
19	650	1	0.740498	1.38463	-11.5982	181.387
20	700	1	0.849672	1.48956	-11.1089	195.132
21	750	1	0.945449	1.55802	-10.4644	204.101
22	800	1	0.981851	1.60279	-10.3822	209.965
23	850	1	0.995198	1.55429	-10.1932	203.611
24	900	1	0.999305	1.62264	-9.81902	212.565
25	fusion		1	2.58066
Sample D
Step	T(oC)	time (hrs)	F3He	4He3HeN	ln(D/a2)	Step Age (Ma)
1	125	1	0.00955586	0.00324077	-19.9287	0.424541
2	150	1	0.0180497	0.00429655	-18.9857	0.562848
3	175	1	0.0255051	0.0104751	-18.6601	1.37224
4	200	1	0.0333762	0.0346716	-18.3043	4.54198
5	225	1	0.045369	0.0839085	-17.5925	10.992
6	250	1	0.0726124	0.133515	-16.3191	17.4904
7	275	1	0.123617	0.172652	-15.1488	22.6174
8	255	1	0.130077	0.195311	-16.935	25.5857
9	235	1	0.131474	0.195926	-18.4327	25.6664
10	215	1	0.131805	0.198637	-19.8662	26.0214
11	225	1	0.132428	0.199399	-19.2279	26.1213
12	250	1	0.135798	0.198024	-17.5237	25.9412
13	275	1	0.152434	0.198337	-15.8457	25.9822
14	300	1	0.193244	0.222613	-14.7392	29.1622
15	325	1	0.242179	0.303481	-14.2831	39.7561
16	325	1	0.291114	0.303481	-14.0302	39.7561
17	305	1	0.297388	0.392775	-15.957	51.4535
18	285	1	0.298871	0.409945	-17.3823	53.7028
19	255	1	0.299075	0.399419	-19.3645	52.3239
20	225	2	0.29913	0.442384	-21.3661	57.9523
21	240	1	0.299204	0.398685	-20.3757	52.2278
22	270	1	0.29972	0.400721	-18.4335	52.4944
23	300	1	0.302745	0.421212	-16.6553	55.1787
24	330	1	0.317489	0.47441	-15.0324	62.1477
25	360	1	0.350113	0.612202	-14.137	80.1984
26	335	1	0.353167	0.708909	-16.433	92.8671
27	305	1	0.353604	0.700591	-18.3715	91.7774
28	275	1	0.353674	0.708542	-20.196	92.819
29	245	2	0.3537	0.608279	-21.8937	79.6846
30	375	1	0.370509	0.826595	-14.6855	108.284
31	375	1	0.37804	0.927329	-15.4404	121.48
32	375	1	0.382547	0.97554	-15.9306	127.796
33	375	1	0.385524	0.992896	-16.3307	130.069
34	350	1	0.386218	0.939551	-17.78	123.081
35	325	1	0.386364	0.943209	-19.3428	123.56
36	300	2	0.386438	0.824105	-20.7028	107.958
37	275	3	0.386473	0.724411	-21.8846	94.8979
38	375	1	0.389136	1.00276	-16.4278	131.362
39	375	2	0.393188	1.00882	-16.6881	132.155
40	425	1	0.414062	1.05581	-14.3081	138.311
41	425	1	0.424739	1.04959	-14.9195	137.497
42	400	1	0.426984	1.07228	-16.4554	140.469
43	375	1	0.427513	1.03119	-17.8959	135.085
44	350	1	0.427643	1.00433	-19.3005	131.567
45	425	2	0.441236	1.05892	-15.3157	138.718
46	425	2	0.452069	1.07112	-15.498	140.316
47	400	3	0.45523	1.07371	-17.11	140.656
48	375	3	0.455993	1.06115	-18.5253	139.01
49	440	1	0.465754	1.07922	-14.8576	141.378
50	440	2	0.482194	1.09507	-14.9823	143.454
51	450	1	0.49247	1.11038	-14.7115	145.46
52	450	24	0.567369	1.17147	-15.7494	153.462
53	460	1	0.569776	1.21012	-15.8753	158.526
54	470	1	0.573567	1.23423	-15.4099	161.684
55	470	1	0.577141	1.24678	-15.4558	163.329
56	470	4	0.588945	1.23798	-15.6197	162.175
57	470	4	0.598008	1.26248	-15.8465	165.385
58	470	4	0.605388	1.26964	-16.0224	166.323
59	500	1	0.60895	1.40508	-15.3448	184.066
60	600	1	0.697441	1.42952	-11.9558	187.267
61	650	1	0.795725	1.55411	-11.4622	203.588
62	700	1	0.887251	1.65709	-11.0031	217.079
63	750	1	0.958	1.6875	-10.4908	221.062
64	800	1	0.99078	1.74112	-10.0628	228.086
65	800	2	0.998464	1.75439	-10.5935	229.825
	fusion		1	3.87925
Sample CuO
Step	T(oC)	time (hrs)	F3He	4He3HeN	ln(D/a2)	Step Age (Ma)
1	31	0.2	0.000650065	9.6082e-06	-23.6949	0.00124907
2	99	1	0.00267551	0.00509097	-22.5356	0.661827
3	124	1	0.00799896	0.00518526	-20.403	0.674083
4	149	1	0.0156907	0.00474923	-19.2378	0.6174
5	174	1	0.0235123	0.0105108	-18.7174	1.3664
6	218	0.5	0.0354171	0.0425847	-17.1966	5.53602
7	264	0.5	0.079232	0.123898	-15.1792	16.1067
8	298	0.5	0.153671	0.178996	-13.8883	23.2694
9	331	0.5	0.231758	0.24066	-13.2671	31.2858
10	323	0.5	0.246066	0.31951	-14.7063	41.5363
11	274	1	0.247233	0.345564	-17.8663	44.9233
12	224	1	0.247285	0.42749	-20.9851	55.5737
13	249	1	0.24751	0.337768	-19.5086	43.9099
14	298	0.5	0.249639	0.358752	-16.5617	46.6378
15	348	0.5	0.272405	0.420371	-14.1303	54.6482
16	398	0.5	0.325903	0.65312	-13.0974	84.9056
17	365	1	0.329681	0.876181	-16.3183	113.904
18	333	1	0.330194	0.864168	-18.3064	112.342
19	300	1	0.330276	0.888317	-20.147	115.481
20	339	1	0.330862	0.974628	-18.1696	126.702
21	373	0.5	0.332832	0.909657	-16.2594	118.255
22	417	0.5	0.347155	0.996486	-14.2418	129.543
23	450	4	0.418912	1.05685	-14.5362	137.39
24	394	0.25	0.419048	1.10411	-17.8957	143.534
25	373	0.5	0.419139	0.999091	-18.9954	129.882
26	349	1	0.419179	1.26445	-20.4897	164.378
27	324	1	0.419194	1.09275	-21.4898	142.057
28	315	3	0.419223	0.954334	-21.9324	124.063
29	339	1	0.419246	1.17865	-21.0488	153.225
30	359	1	0.419305	1.19657	-20.1293	155.554
31	374	1	0.419442	1.12198	-19.2773	145.858
32	399	1	0.419869	1.13749	-18.1377	147.874
33	700	0.26	0.707796	1.29316	-9.71162	168.111
34	448	1	0.707931	1.44595	-18.2351	187.974
35	750	0.25	0.844096	1.45263	-9.59111	188.842
36	750	0.5	0.915186	1.59275	-9.10718	207.057
37	800	0.5	0.977267	1.51307	-8.59526	196.699
38	900	0.5	0.999994	1.60933	-7.34	209.213
